# Supplementary material
Source: HighWire-hosted journal article supplement (https://openres.ersjournals.com/content/8/3/00140-2022)
Supplement: inline-supplementary-material-2 [file inline-supplementary-material-2.pdf]

Appendix Figure 1 Study design diagram

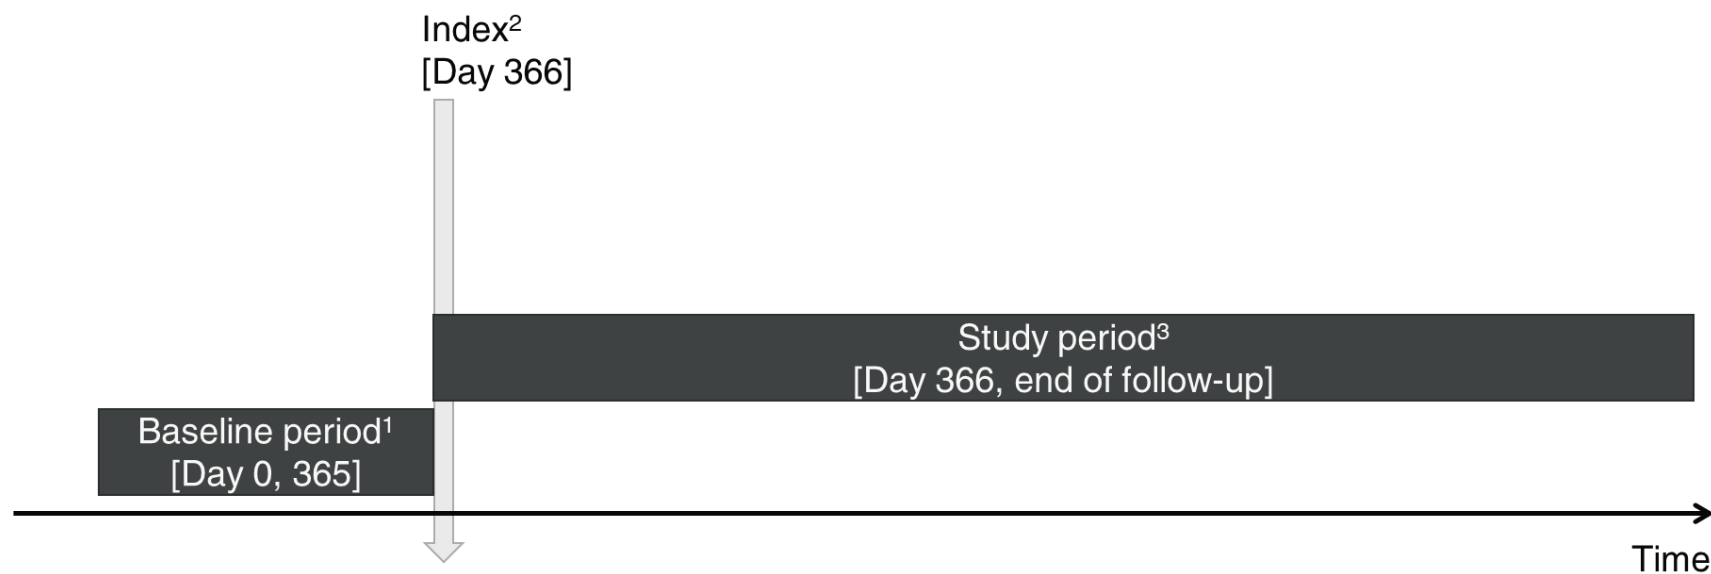

1. Used to assess case definition and to characterize baseline comorbidity, asthma disease severity, the frequency of asthma-related prescription claims, physician visits, and exacerbations; note that baseline period started at the first eligible diagnosis meeting the case definition of  $\geq 2$  physician visits in a two-year period or  $\geq 1$  hospital separation admission with a diagnosis of asthma [ICD-9-CM 493 or ICD-10-CA J45], with the earliest date possible being October 1<sup>st</sup>, 2016 for Nova Scotia and April 1<sup>st</sup>, 2016 for Alberta
2. Used to characterize the age and sex of patients included
3. Used to measure all study outcomes; note that end of follow-up was defined as the first occurrence of death, emigration from the province, or the end of the study period (Nova Scotia: March 31<sup>st</sup> 2019; Alberta: March 31<sup>st</sup>, 2020)
