# Supplementary material
Source: HighWire-hosted journal article supplement (https://openres.ersjournals.com/content/8/3/00140-2022)

Appendix Figure 2 Study consort diagram

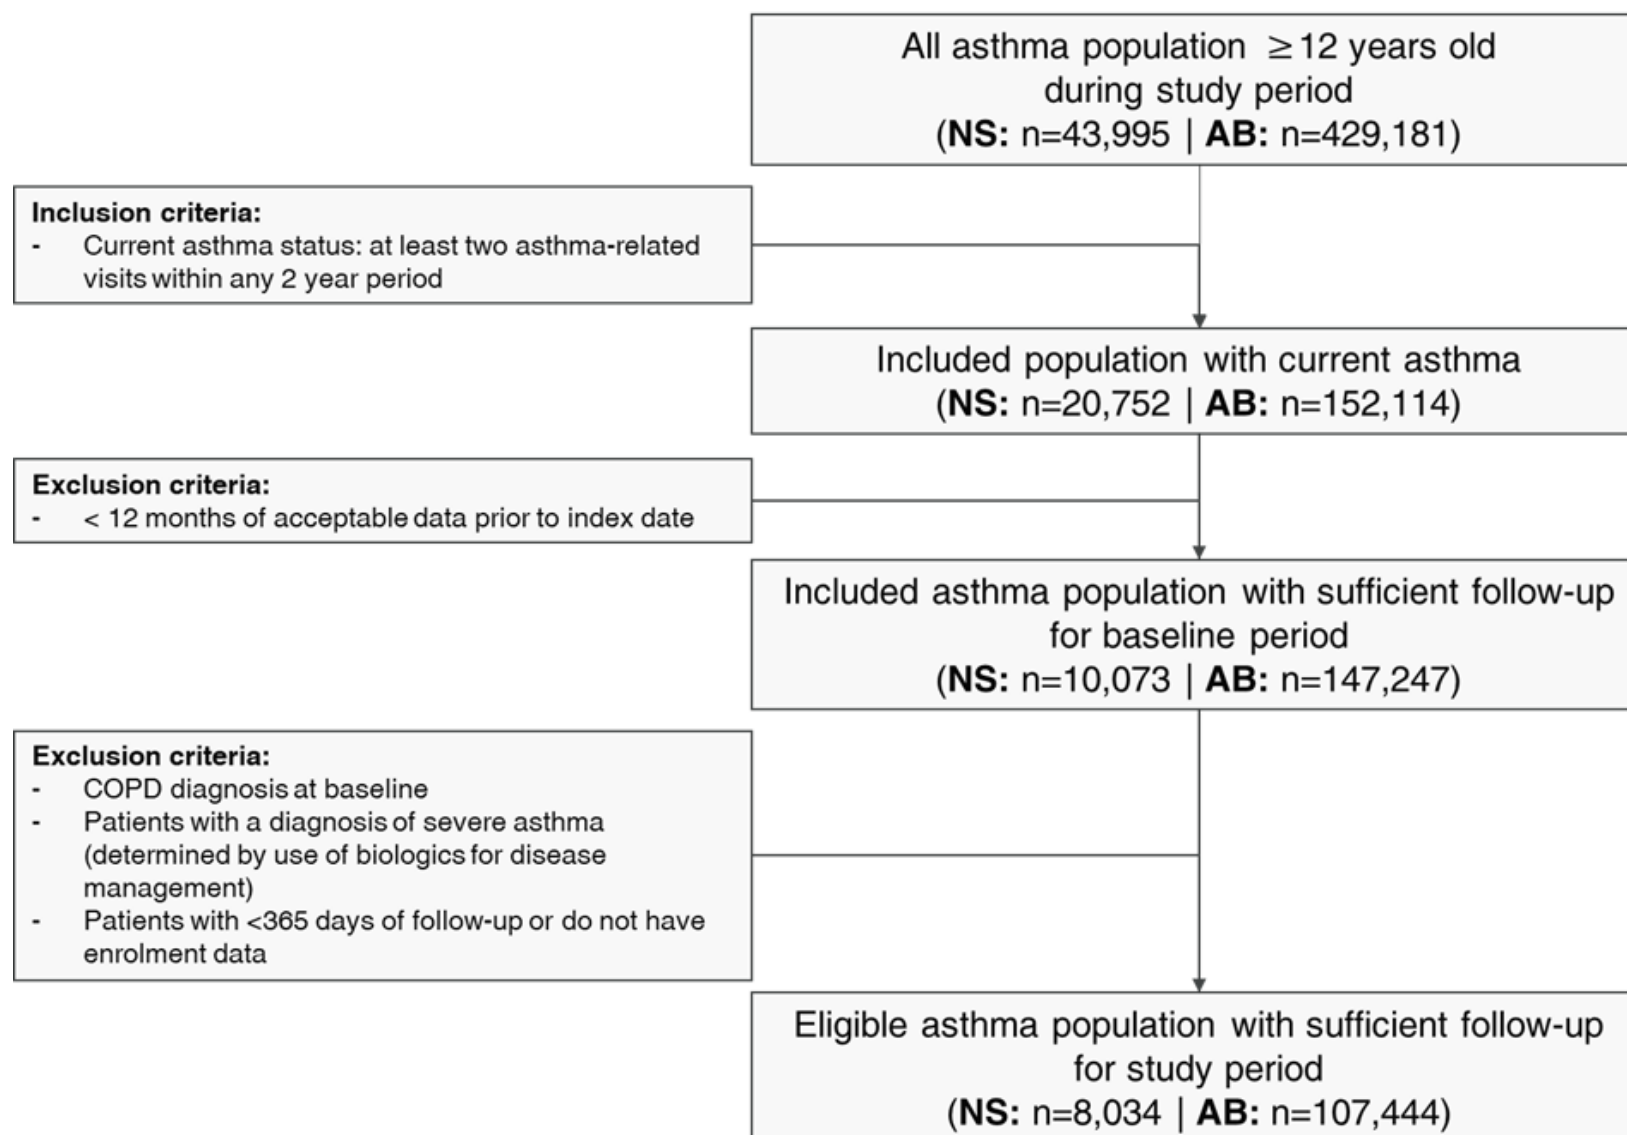

Supplement: inline-supplementary-material-3 [file inline-supplementary-material-3.pdf]
